# Supplementary material
Source: PubMed Central journal article supplement (PMC6413881)
Supplement: NIHMS1007545-supplement-Supplement.pdf [file NIHMS1007545-supplement-Supplement.pdf]

## Supporting Information

### Human Neuronal Calcium Sensor-1 Protein Avoids Histidine Residue to Decrease pH Sensitivity

*Yehong Gong*<sup>1</sup>, *Yuzhen Zhu*<sup>2</sup>, *Yu Zou*<sup>1</sup>, *Buyong Ma*<sup>3</sup>, *Ruth Nussinov*<sup>3,4</sup>, *Qingwen Zhang*<sup>1,\*</sup>

<sup>1</sup>College of Physical Education and Training, Shanghai University of Sport, 399 Chang Hai Road, Shanghai, 200438, China

<sup>2</sup>Physical Education College, Shanghai Normal University, 100 Gui Lin Road, Shanghai, 200234, China

<sup>3</sup>Basic Science Program, Leidos Biomedical Research, Inc. Cancer and Inflammation Program, National Cancer Institute, Frederick, Maryland 21702, United States

<sup>4</sup>Sackler Inst. of Molecular Medicine, Department of Human Genetics and Molecular Medicine, Sackler School of Medicine, Tel Aviv University, Tel Aviv 69978, Israel

**This material includes 7 Supplemental figures.**

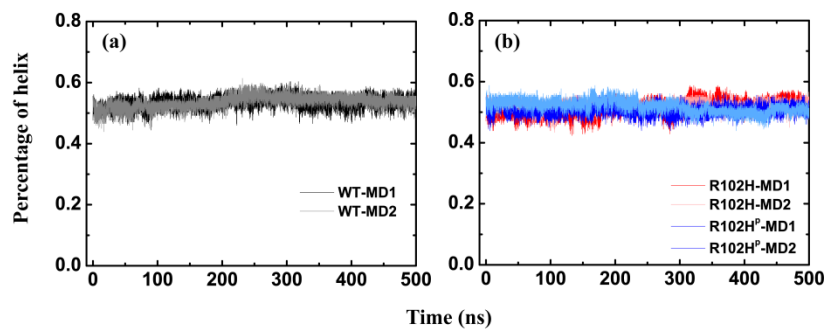

**Figure S1** Time evolution of the percentage of helix for WT NCS-1 (black and gray curves), its R102H mutant NCS-1 (red and pink curves) and its R102H<sup>P</sup> mutant (blue and light blue curves) in two different MD trajectories (WT-MD1 and WT-MD2 for the WT NCS-1, R102H-MD1 and R102H-MD2 for the R102H mutant, and R102H<sup>P</sup>-MD1 and R102H<sup>P</sup>-MD2 for the R102H<sup>P</sup> mutant).

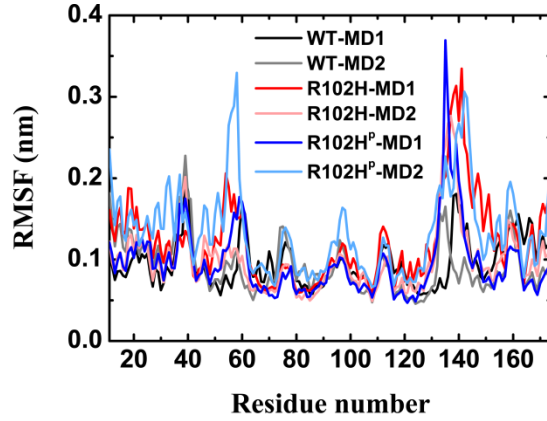

**Figure S2**  $C\alpha$ -RMSF of the core structure for WT NCS-1, the R102H mutant, and the R102H<sup>P</sup> mutant in the two independent MD runs. The  $C\alpha$ -RMSF values were calculated using the last 100 ns data of each MD trajectory for all systems.

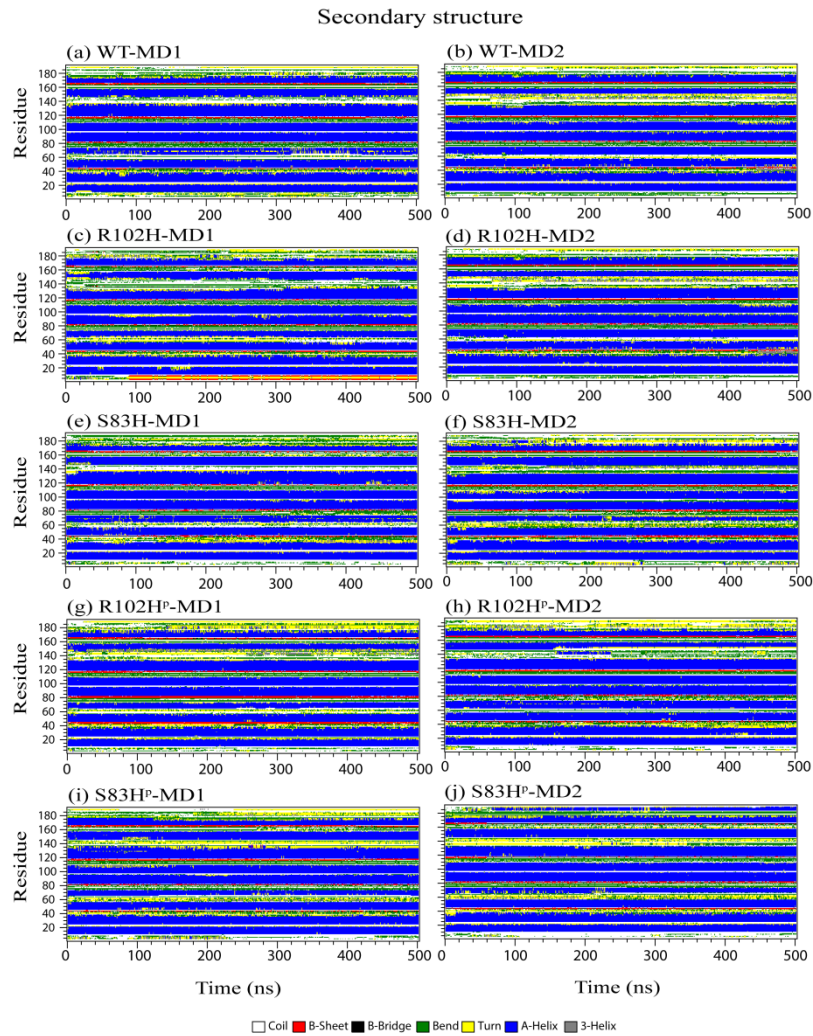

**Figure S3** Secondary structure profiles of the WT NCS-1 (a, b), the R102H mutant (c, d), the S83H mutant (e, f), the R102H<sup>P</sup> mutant (g, h) and the S83H<sup>P</sup> mutant (i, j) NCS-1 protein as a function of simulation time in the all 500 ns MD simulations.

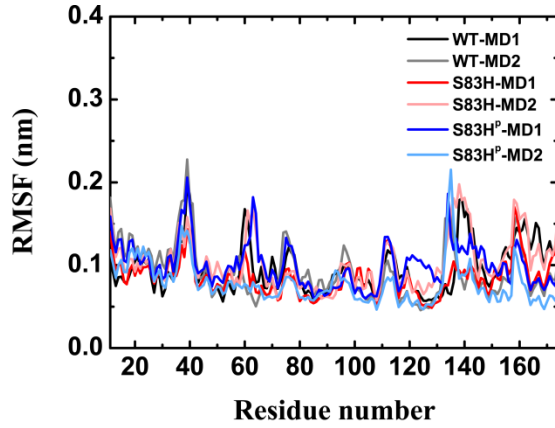

**Figure S4**  $C\alpha$ -RMSF of the core structure for WT NCS-1, the S83H mutant, and the S83H<sup>P</sup> mutant in the two independent MD runs. The  $C\alpha$ -RMSF values were calculated using the last 100 ns data of each MD trajectory for all systems.

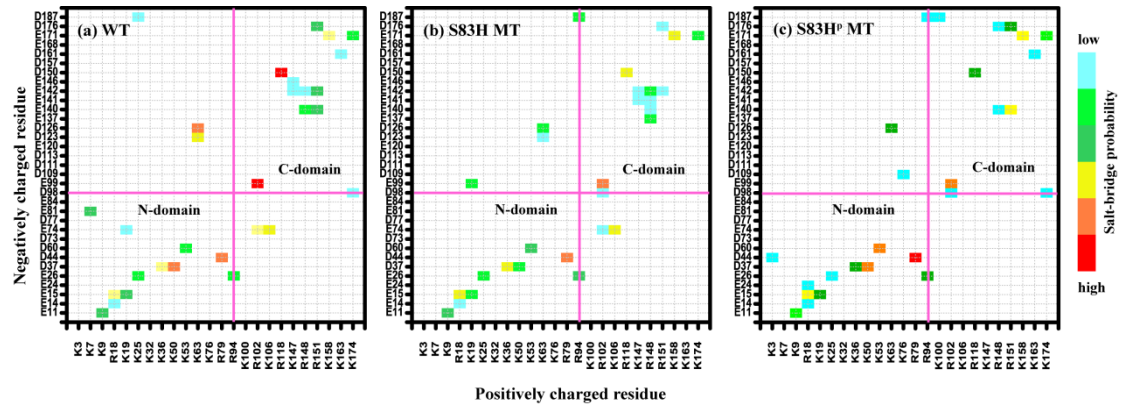

**Figure S5** S83H and S83H<sup>P</sup> mutations shift the salt-bridge network of WT NCS-1. Salt-bridge probability maps for (a) WT NCS-1, (b) the S83H mutant, and (c) the S83H<sup>P</sup> mutant.

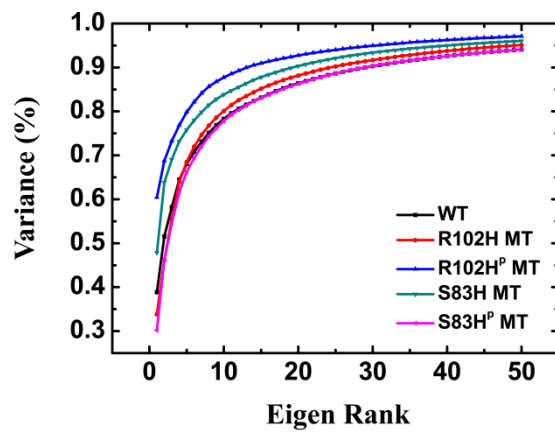

**Figure S6** The accumulation of variance. Only two PCs are needed to capture more than 40% of the variance and the first four PCs captured around 40% information of all systems.

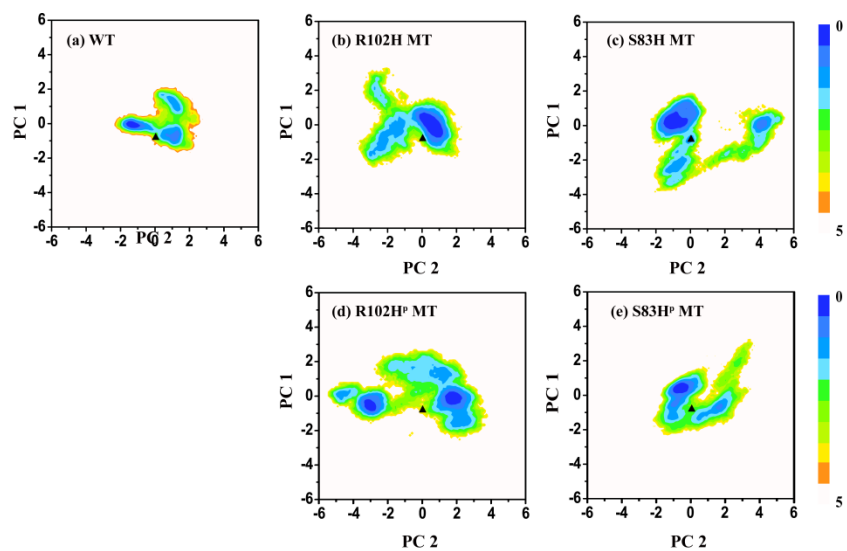

**Figure S7** Free-energy surface (in kcal/mol) of the WT (a) and the R102H (b), S83H (c), R102H<sup>P</sup> (d), and S83H<sup>P</sup> (e) mutants as a function of PC1 and PC2, with 2LCP mapped on.
